# Supplementary material for: Innovative utilization of argon plasma coagulation combined with endoclips for managing gastrointestinal bleeding attributed to colonic diverticular bleeding: a retrospective study
Source: PeerJ. 2025 Aug 29;13:e19910. doi: 10.7717/peerj.19910 (PMC12401019; doi:10.7717/peerj.19910)
Supplement: Supplemental Information 1 [file peerj-13-19910-s001.xlsx]

## Sheet: Sheet1
Patient number	Age	Gender	Follow-up	Episodes of bleeding before treatment	Course of disease	Emergency colonoscopy	History of gastrointestinal bleeding	Intestinal preparation (0: No; 1: Yes)	History of blood transfusion (0: None; 1: Yes)	Height	Weight	Hypertension	Diabetes	Coronary heart disease	Chronic kidney disease	Cerebrovascular disease	Medication history (anticoagulation, anti-plate)	Acute hemorrhage and shock	Gastroscopy (0: not done; 1: done)	DBE (0: not done; 1:1 side; 2:2 side)	R/O	Capsule endoscopy	CT/CTE	DSA	Abdominal pain/uncomfortable (1: yes; 0: no)	Postoperative fever (1: Yes; 0: No)	Postoperative rebleeding (0: none; 1: yes - cause)	Postoperative hospital stay	Diverticular bleeding (0: no signs of recent bleeding; 1: endoscopic bleeding: active bleeding A; naked blood vessel V; blood clot C)	adherent clots; a non-bleeding vessel;active bleeding	Number of treatments	complication	A total of several treatments were performed (excluding management of complications).
1	74	Female	3	10	3y	0	1	1	1	165	50	1	0	0	0	0	0	0	1	1	R-500	0	1	0	1	38.1	0	5	0		37		2
	75	Female				0												0	0	0		0	1	0	0	0	0	5	0		12
2	51	Female	1	2	2d	1	0	0	1	166	75	0	0	0	0	0	NSAIDS	1	1	1	R-130	0	0	0	1	0	0	6	1	adherent clots	1		2
	51	Female				0		1										0	0	0		0	0	0	0		0	2	0		6
3	59	Male	1	3	4y	0	1	1	1	170	82	1	0	0	0	1	0	0	1	2	R-250；O:400	0	1	1	0	0	0	1	0		4		1
4	75	Male	1	3	4y	0	1	1	1	172	64	0	0	0	0	0	Anticoagulant drugs	0	1	1	R-150	0	1	0	0	0	0	4	0		8		1
5	47	Male	1	1	4m	0	1	1	1	170	95	1	1	1	0	0	NSAIDS	0	1	1	O-290；R:30	0	1	1	0	0	0	4	0		2		1
6	48	Male	2	11	9y	1	1	1	1	179	80	1	0	0	0	0	0	0	1	2	O-240 ；R-400	1	1	1	1	37.9	0	6	1	active bleeding	12		2
	49	Male				0		1										0							0	0	0	6	0		14
7	62	Male	5	1	2d	0	1	1	1	168	70	1	0	0	0	0	NSAIDS	0	1	1	R-120	0	1	1-Abnormal staining of ileocecum	0	38.1	Rebleeding after 1-10 days; wound bleeding	8	0		13		1
8	65	Male	1	1	3d	1	0	1	1	172	70	1	1	0	0	0	0	1	0	2	O:400；R:300	0	1	0	0	0	0	6	0		8		2
9	57	Male	3	3	13y	0	1	1	0	168	67	0	0	0	0	0	0	0	1	0	0	0	1	0	0	0	0	2	0		7		2
	59	Male																							0	0	0	5			7
10	47	Male	1	2	2y	1	1	1	1	176	85	1	1	0	0	0	0	1	1	2	R-200;O-450	0	1	1	0	0	0	7	1	active bleeding	4		1
11	58	Male	2	2	2y	0	1	1	1	174	80	1	1	1	0	0	0	0	1	2	R-300;O-270	0	1	0	0	0	0	4	0		8		2
	58	Male				0												0							0	0	0	3	0		1
12	58	Male	1	1	1d	1	0	0	1	167	67	0	1	1	1	0	NSAIDS	1	1	1	R-220	0	1	0	0	0	0	3	1	adherent clots	1		2
	58	Male				0		1										0							0	0	0	2	0		4
13	54	Male	4	15	6y	0	1	1	1	170	80	1	0	0	0	1	NSAIDS	1	1	2	O-550；R-170	1	1	0	0	0	1	5	0		17		2
	55	Male				0		1																	0	0	0	6	0		8
14	56	Male	3	8	5y	0	1	1	1	165	70	1	0	0	0	1	0	0	0	1	O-400；R-60	0	1	0	0	0	0	5	0		8		2
	58	Male				0		1										0							0	0	Bleeding after 1-9 days	6	0		12
	58	Male				1		0										1							0	0	0	5	0		12
15	64	Male	2	1	5d	1	0		1	175	62	1	1	1	0	0	Prednisone Acetate	1	0	2	O-500；R-200	0	1	1	1	0	1		0		1		2
	64	Male																											1	a non-bleeding vessel	0
	64	Male																											1		0	perforation
	64	Male																													0
	65	Male																							0	0			0		4
16	94	Female	2	2	7m	0	1	1	0	150	55	1	1	0	0	0	0	0	0	0	0	0	1	0	1	0	0	6	0		19	perforation	1
	94	Female				1																			0		0	5	0		6
17	56	Male	1	1	7d	1	0	0	1	无		1	0	0	0	0	0	1	1	0	0	1	1	1	0	0	0	3	0		14		1
18	64	Male	4	3	2y	0	1	1	1	167	74	1	0	0	0	1	0	0	0	1	R-280	0	1	0	0	0	0	5	0		5		2
	64	Male				0		1										0							0	0	1	4			4
	64	Male				0		1										0	1	2	R-360；O-400		1		0	0	0	6、3			1
19	47	Male	1	1	7d	0	0	1	0	170	79	1	0	0	0	0	0	0	1	2	O-500;R-200	0	1	0	0	0	0	4	0		9		2
	48	Male				0																			0	0	0	4	0		10
20	43	Male	2		10d	0	0	1	1	170	80	1	1	0	0	0	0	1	1	2	R-460;O-120	0	0	0	0	0	1	未处理憩室			0		1
	44	Male		2		1	1	1												1	R-320	0	0	0	0	0	0	4	0		2
21	51	Male	2	1	7d	1	0	1	1	177	85	0	0	0	0	0	0	0	1	2	R-320；O-440	0	1	1	0	0	0	3	0		3		2
	52	Male				0												0							0	0	0	3			2
22	62	Male	2	1	5d	1	0	0	0	174	85	1	0	0	0	0	0	1	1	1	R-120	0	0	0	0	0	0	5	1	a non-bleeding visible vessel	1		1
23	43	Male	2	1	7d	1	0	0	1			0	0	0	0	0	0	1	1	1	R-250	0	1	0	0	0	0	7	1	adherent clots	1		3
	43	Male						1		180	77.5	0	0	0	0	0	0	0							0	0	0	5	0		4
	44	Male																0							0	0	0	6	0		5
24	50	Male	4	1	1d	1	0	1	1	168	84	0	0	0	0	0	0	1	0	1	R-150	0	1	0	0	0	0	7	1	a non-bleeding visible vessel	1		1
25	59	Male	2	3	6m	1	1	0	1	170	80	1	1	0	0	0	0	1	1	1	O-600	0	0	1	0	0	0	3	1	active bleeding	12		2
	59	Male				0												0							0	0	0	3	0		6
26	59	Male	1	3	4y	0	1		1	180	90	1	1	0	0	1	0	0	1	2	R：250；O:400	0	1	1	0	0	0	5	0		11		3
	59	Male				0												0							0	0	0	4	0		12
	59	Male				0												0							0		0	4	0		10
27	66	Male	1	4	3y	0	1	1	1	174	70	1	0	0	0	0	0	0		2	R:300;O:350	0	1	0	0	0	0	3	1	adherent clots	1		2
	66	Male				0												0							0	0	0	2	0		3
28	49	Male	3	15	5y	0	1	1	1	172	80	1	0	1	0	0	0	0	1	2	R-300;O-400	1	1	0	0		Rebleeding after 1-10 days		1	active bleeding	12		2
	49	Male				1		1										1							0	0		4	0		1
	49	Male				1												1							0	0		4			6
29	48	Male	1	2	9m	0	1	1	0	175	80	0	0	0	0	0	0	0	1	1	R-50	1	1	0	1	0	0	7	0		14		1
30	53	Male	1	1	2d	1	0	1	1	180	85	1	1	0	0	0	0	1	1	2	R-400;O-160	0	1	0	0	0	0	2	0		10		1
31	71	Male	4	2	6m	0	1	1	1	175	70	1	0	0	0	1	NSAIDS	0	1	0	0	1	1	1	0	0	0	3	0		3		2
	72	Male				0		1										0							0	0	0	4	0		4
32	45	Male	1	7	6y	0	1	1	1	167	74	1	0	0	0	0	0	0	1	2	R-220；O-370	0	1	0	0	0	0	4	0		8		1
33	74	Male	1	5	3.5y	0	1	1	0	170	58	1	0	0	0	1	NSAIDS	0	1	2	R-260；O-450	1	1	0	0	0	0	4	0		1		2
34	59	Male	5	1	10d	0	0	1	0	172	65	1	0	0	0	0	0	1	1	2	R-270;O-300	1	1	0	0	0	0	6	0		3		2
	59	Male						1										0							0	0	0	4	0		1
35	73	Male	1	5	11y	1	1	1	1	173	80	1	0	0		0	0	1	1	1	R-150	0	1	0	0	0	0	5	1	active bleeding	4		2
																															5

## Sheet: Sheet2
age	Gender	HB difference before and after treatment	Hemoglobin (lowest)	HB preoperative	HB (after treatment)	Preoperative white blood cell count	Neutrophil count (preoperative)	CRP	WBC on the first day after treatment	NE on the first day after treatment	CRP on the first day after treatment	WBC on the second day after treatment	NE on the second day after treatment	CRP on the second day after treatment	WBC on the third day after treatment	NE on the third day after treatment	CRP on the third day after treatment	WBC on the forth day after treatment	NE on the forth day after treatment	CRP on the forth day after treatment	WBC on the fifth day after treatment	NE on the fifth day after treatment	CRP on the fifth day after treatment
74	Female	83	40	112	113	3.6	1.8	1.4	8.16	6.92	2.13							4.29	2.57	36.93
51	Female	64	74	76	89	8.14	7.61	2.32	7.24	6											10.21	8.46	23.59
59	Male	17	88	88	105	4.96	3.48	3.41	7.53	5.68	10.43
75	Male	4		111	119	4.93	3.37	0.5	7.28	5.52	9.72				8.03	5.88	43.14
47	Male	45	90	135	135	5.34	2.88
48	Male	30		147	125	6.42	4.22	0.65	11.13	9.48	8.72	7.05	5.16	70.69				4.35	2.73	35.68
62	Male	81	37	118	118	6.1	3.7	6	10.2	9	19				7.67	6.39	102
65	Male	37	82	82	119	4.68	2.98		5.06	3.82	28.35				4.19	3.43	61.8
57	Male	7		128		5.29	2.93	0.5				8.26	6.2	31.61
47	Male	51	75	126	130	6.22	5.04	4.2	9.78	8.52		8.05	6.36	166.18	7.06	6.05	93.16										4.59	3.01	14.88
58	Male	35	63	70	77	4.56	2.91	0.5							6.22	4.56	47.02
58	Male	30	91	117	106				11.58	9.25	3.34				10.96	8.34	13.4
54	Male	24	80	80		6.55	4.59
56	Male	37		126	132	11.23	9.63	17.75							6.83	5.1	21.02
64	Male	66	55	55		7.7	6.1		12.59	11.71		11.71	9.34	22.94
94	Female	8	94	102	105	5.72	2.46		12.59	10.16	62.88							5.54	3.49	97.75	6.02	3	73.6
56	Male	13	57	57	70	12.11	10.39	10.27	14.85	13.5	24.04				8.97	7.75	43.01
64	Male	59	73	132		4.4	2.4
47	Male	53	77	77	82	7.81	5.48	0.5	14.28	11.33	3.94	9.81	7.92	56.4				7	5.09	29.37
44	Male	74		79	153	6.93	5.35	0.56	9.03	7.1	11.99							6.34	4.59	12
51	Male	78	68	111	114	6.74	4.93	3.08				8.52	6.23	40.61
62	Male	11	77	77	88	4.99	4.27	8.95	5.21	3.21	10.7	4.61	2.52	14.89	4.92	2.38	10.61
43	Male	109	45	45	76	11.99	10.4	4.17							5.71	3.97
50	Male	102	56	56	158	8.86	7.04	5	9.2	6.8		7.9	5.6	30				5.72	3.96	15	5.2	3.4	5
59	Male	17	114	129	131	7.8	5.92	0.5				6.3	4.54	64.56
59	Male	12		143	138	5.43	3.35		7.33	5.27	1.52
66	Male	74	60	89	89	7.99	6.15					5.45	3.79
49	Male	12	92	105	108	5.39	3.98	2.2							5.5	4.34
48	Male	13		121	134	6.44	2.86	1.3	11.71	8.65	12.27				9.73	5.92	93.63							8.61	4.88	21.64
53	Male	16	84	84	100	15	11.35		12.51	9.88	20.63
71	Male	90	60	66	80	3.5	2.4	2				5.6	4.6	8
45	Male	41	115	156	110	8.57	5.07	0.6				11.1	8.59	6.69							7.62	4.93	15.21
74	Male	27	95	122	115	6.44	4.38	1.27							5.43	3.7	0.5
59	Male	21		117		10.97	9.25					8.7	6.6	85
73	Male	61		78	139	4.11	2.85	1.86	6.12	5.08	3.37
